# Supplementary material
Source: PubMed Central journal article supplement (PMC6521693)
Supplement: NIHMS1510372-supplement-1.pdf [file NIHMS1510372-supplement-1.pdf]

Supplemental Materials for  
**Potential Causal Influence of Neighborhood Disadvantage on Disordered Gambling:  
Evidence from a Multi-level Discordant Twin Design**

W.S Slutske, T.M. Piasecki, A.R. Deutsch, D.B. Statham, & N.G Martin

**Contents:**

- 1) Supplemental Table 1.  
Correlations of facets of MPQ Negative Emotionality and Constraint with disordered gambling symptom counts and neighborhood disadvantage
- 2) Supplemental Table 2.  
Results from multilevel models predicting DSM 5 disordered gambling symptom counts in MZ and DZ twins
- 3) Supplemental Table 3.  
Results from multilevel models predicting SOGS symptom counts in MZ and DZ twins
- 4) Supplemental Table 4.  
Results from multilevel models predicting DSM-IV alcohol use disorder symptom counts in MZ and DZ twins

*Supplemental Table 1. Correlations of facets of MPQ Negative Emotionality and Constraint with disordered gambling symptom counts and neighborhood disadvantage*

| MPQ Superfactor or facet | Disordered<br>gambling | Neighborhood<br>disadvantage |
|--------------------------|------------------------|------------------------------|
| Negative Emotionality    | <b>0.21</b>            | <b>0.12</b>                  |
| Stress Reaction          | <b>0.14</b>            | <b>0.06</b>                  |
| Alienation               | <b>0.18</b>            | <b>0.14</b>                  |
| Aggression               | <b>0.16</b>            | <b>0.05</b>                  |
| Constraint               | <b>-0.08</b>           | 0.03                         |
| Control                  | <b>-0.13</b>           | -0.03                        |
| Harm Avoidance           | <b>-0.06</b>           | 0.01                         |
| Traditionalism           | 0.03                   | <b>0.09</b>                  |

*Note:* MPQ = Multidimensional Personality Questionnaire; significant correlations ( $p < .05$ ) are in bold font.

*Supplemental Table 2. Results from multilevel models predicting DSM-5 disordered gambling symptom counts in MZ and DZ twins*

| Predictor                 | Base Model |              | Personality |              | Education |              | Income |              | Fully Adjusted |              |
|---------------------------|------------|--------------|-------------|--------------|-----------|--------------|--------|--------------|----------------|--------------|
|                           | IRR        | 95% CI       | IRR         | 95% CI       | IRR       | 95% CI       | IRR    | 95% CI       | IRR            | 95% CI       |
| Sex                       | 1.80**     | (1.20, 2.70) | 1.76*       | (1.07, 2.88) | 1.78**    | (1.20, 2.63) | 1.98** | (1.31, 2.97) | 1.65           | (0.99, 2.73) |
| Age                       | 1.06       | (0.97, 1.16) | 1.03        | (0.93, 1.15) | 1.07      | (0.98, 1.17) | 1.08   | (0.98, 1.18) | 1.04           | (0.94, 1.16) |
| WP Disadvantage           | 1.18*      | (1.04, 1.35) | 1.14        | (0.97, 1.34) | 1.19**    | (1.05, 1.36) | 1.20** | (1.05, 1.37) | 1.14           | (0.96, 1.34) |
| BP Disadvantage           | 1.18***    | (1.08, 1.28) | 1.07        | (0.97, 1.19) | 1.11*     | (1.02, 1.22) | 1.13*  | (1.02, 1.24) | 1.07           | (0.96, 1.19) |
| WP Positive Emotionality  |            |              | 1.00        | (0.96, 1.04) |           |              |        |              | 1.00           | (0.96, 1.04) |
| BP Positive Emotionality  |            |              | 0.99        | (0.96, 1.02) |           |              |        |              | 0.99           | (0.96, 1.02) |
| WP Negative Emotionality  |            |              | 1.05*       | (1.00, 1.09) |           |              |        |              | 1.05*          | (1.01, 1.09) |
| BP Negative Emotionality  |            |              | 1.12***     | (1.08, 1.15) |           |              |        |              | 1.11***        | (1.08, 1.15) |
| WP Constraint             |            |              | 0.97        | (0.92, 1.01) |           |              |        |              | 0.97           | (0.92, 1.01) |
| BP Constraint             |            |              | 0.99        | (0.96, 1.02) |           |              |        |              | 0.99           | (0.96, 1.02) |
| WP Educational Attainment |            |              |             |              | 0.83      | (0.61, 1.12) |        |              | 0.75           | (0.51, 1.11) |
| BP Educational Attainment |            |              |             |              | 0.74***   | (0.62, .88)  |        |              | 0.84           | (0.67, 1.05) |
| WP Household Income       |            |              |             |              |           |              | 0.91   | (0.78, 1.06) | 0.97           | (0.80, 1.16) |
| BP Household Income       |            |              |             |              |           |              | 0.93   | (0.82, 1.06) | 1.10           | (0.94, 1.29) |

*Note:* Because neither the main effect for zygosity (IRR = 1.08, 95% CI = 0.71 to 1.63,  $p = .715$ ) nor the zygosity x within-pair disadvantage effect (IRR = 1.17, 95% CI = 1.00 to 1.30,  $p = .990$ ) was significant, these predictors were not included in the models.

\* $p < .05$ , \*\* $p < .01$ , \*\*\* $p < .001$ . DSM 5 = Diagnostic and Statistical Manual of Mental Disorders, Version 5; WP = Within-pair; BP = Between-pair

**Supplemental Table 3.** Results from multilevel models predicting SOGS symptom counts in MZ and DZ twins

| Predictor                 | Base Model |              | Personality |              | Education |              | Income  |              | Fully Adjusted |              |
|---------------------------|------------|--------------|-------------|--------------|-----------|--------------|---------|--------------|----------------|--------------|
|                           | IRR        | 95% CI       | IRR         | 95% CI       | IRR       | 95% CI       | IRR     | 95% CI       | IRR            | 95% CI       |
| Sex                       | 1.75***    | (1.42, 2.15) | 1.46**      | (1.16, 1.85) | 1.72***   | (1.40, 2.12) | 1.79*** | (1.45, 2.23) | 1.46**         | (1.14, 1.86) |
| Age                       | 1.02       | (0.97, 1.07) | 1.01        | (0.96, 1.07) | 1.02      | (0.97, 1.07) | 1.03    | (0.98, 1.08) | 1.02           | (0.97, 1.08) |
| WP Disadvantage           | 1.09***    | (1.04, 1.15) | 1.08**      | 1.02, 1.14)  | 1.09**    | (1.03, 1.15) | 1.09**  | (1.03, 1.15) | 1.07*          | (1.01, 1.14) |
| BP Disadvantage           | 1.13***    | (1.07, 1.19) | 1.07*       | (1.01, 1.14) | 1.08**    | (1.03, 1.14) | 1.10**  | (1.04, 1.16) | 1.04           | (0.98, 1.11) |
| WP Positive Emotionality  |            |              | 1.00        | (0.98, 1.01) |           |              |         |              | 1.00           | (0.99, 1.02) |
| BP Positive Emotionality  |            |              | 1.00        | (0.98, 1.01) |           |              |         |              | 1.00           | (0.98, 1.02) |
| WP Negative Emotionality  |            |              | 1.04***     | (1.02, 1.05) |           |              |         |              | 1.04***        | (1.02, 1.05) |
| BP Negative Emotionality  |            |              | 1.06***     | (1.05, 1.08) |           |              |         |              | 1.06***        | (1.04, 1.08) |
| WP Constraint             |            |              | 0.97***     | (0.95, 0.99) |           |              |         |              | 0.97***        | (0.95, 0.99) |
| BP Constraint             |            |              | 0.99        | (0.97, 1.00) |           |              |         |              | 0.99           | (0.97, 1.00) |
| WP Educational Attainment |            |              |             |              | 0.87*     | (0.78, 0.99) |         |              | 0.92           | (0.80, 1.06) |
| BP Educational Attainment |            |              |             |              | 0.78***   | (0.70, 0.86) |         |              | 0.85**         | (0.75, .96)  |
| WP Household Income       |            |              |             |              |           |              | 0.95    | (0.90, 1.01) | 0.99           | (0.93, 1.05) |
| BP Household Income       |            |              |             |              |           |              | 0.91*   | (0.85, 0.98) | 0.97           | (0.90, 1.05) |

Note: Because neither the main effect for zygosity (IRR = 1.00, 95% CI = 0.79 to 1.26,  $p = .998$ ) nor the zygosity x within-pair disadvantage effect (IRR = 0.94, 95% CI = 0.85 to 1.04,  $p = .248$ ) was significant, these predictors were not included in the models.

\* $p < .05$ , \*\* $p < .01$ , \*\*\* $p < .001$ . SOGS = South Oaks Gambling Screen; WP = Within-pair; BP = Between-pair

**Supplemental Table 4.** Results from multilevel models predicting alcohol use disorder symptom counts in MZ and DZ twins

| Predictor                 | Base Model |              | Personality |              | Education |              | Income  |              | Fully Adjusted |              |
|---------------------------|------------|--------------|-------------|--------------|-----------|--------------|---------|--------------|----------------|--------------|
|                           | IRR        | 95% CI       | IRR         | 95% CI       | IRR       | 95% CI       | IRR     | 95% CI       | IRR            | 95% CI       |
| Sex                       | 1.85***    | (1.52, 2.25) | 1.52***     | (1.21, 1.89) | 1.86***   | (1.53, 2.27) | 1.90*** | (1.55, 2.32) | 1.50***        | (1.19, 1.89) |
| Age                       | 0.96       | (0.92, 1.01) | 0.97        | (0.93, 1.02) | 0.96*     | (0.92, 1.00) | 0.96    | (0.92, 1.01) | 0.97           | (0.93, 1.02) |
| WP Disadvantage           | 1.00       | (0.94, 1.07) | 0.97        | (0.90, 1.04) | 1.01      | (0.94, 1.07) | 0.99    | (0.92, 1.06) | 0.96           | (0.89, 1.03) |
| BP Disadvantage           | 0.99       | (0.95, 1.04) | 0.95*       | (0.90, 0.99) | 0.97      | (0.93, 1.02) | 0.98    | (0.93, 1.02) | 0.92**         | (0.87, 0.97) |
| WP Positive Emotionality  |            |              | 0.99        | (0.97, 1.01) |           |              |         |              | 0.99           | (0.97, 1.01) |
| BP Positive Emotionality  |            |              | 0.99        | (0.98, 1.01) |           |              |         |              | 0.99           | (0.98, 1.01) |
| WP Negative Emotionality  |            |              | 1.04***     | (1.02, 1.06) |           |              |         |              | 1.04***        | (1.02, 1.06) |
| BP Negative Emotionality  |            |              | 1.04***     | (1.03, 1.05) |           |              |         |              | 1.04***        | (1.02, 1.05) |
| WP Constraint             |            |              | 0.98*       | (0.96, 1.00) |           |              |         |              | 0.98*          | (0.96, 1.00) |
| BP Constraint             |            |              | 0.96***     | (0.95, 0.97) |           |              |         |              | 0.96***        | (0.94, .97)  |
| WP Educational Attainment |            |              |             |              | 0.98      | (0.85, 1.13) |         |              | 1.03           | (0.87, 1.20) |
| BP Educational Attainment |            |              |             |              | 0.88**    | (0.81, 0.97) |         |              | 0.88*          | (0.79, .98)  |
| WP Household Income       |            |              |             |              |           |              | 0.91**  | (0.85, 0.98) | 0.96           | (0.89, 1.03) |
| BP Household Income       |            |              |             |              |           |              | 0.96    | (0.91, 1.02) | 1.00           | (0.93, 1.07) |

Note: Because neither the main effect for zygosity (IRR = 1.00, 95% CI = 0.79 to 1.26,  $p = .194$ ) nor the zygosity x within-pair disadvantage effect (IRR = 0.94, 95% CI = 0.85 to 1.04,  $p = .594$ ) was significant, these predictors were not included in the models.

\* $p < .05$ , \*\* $p < .01$ , \*\*\* $p < .001$ . WP = Within-pair; BP = Between-pair
